# Supplementary material
Source: ML conference proceedings conference paper supplement (https://openreview.net/forum?id=kmKVJl2JWo)
Supplement: supplementary_material [file attachment]

## A Notations

Table 1: Summary of notations

|                       |                                                                              |
|-----------------------|------------------------------------------------------------------------------|
| $A_b$                 | set of arms played during block $b$                                          |
| $A_t$                 | set of arms played during time step $t$                                      |
| $A_{u,t}$             | arm played by user $u$ during time step $t$                                  |
| $A_*$                 | set of top $U$ arms                                                          |
| $A^-$                 | set of arms $A \setminus A_*$                                                |
| $B$                   | number of blocks                                                             |
| $B_{a,b}$             | number of blocks arm $a$ is played up till block $b$                         |
| $K$                   | number of arms                                                               |
| $L_{b,i}$             | set of arms in $A_b^-$ where $B_{a,b-1} \leq m_{b,i}$                        |
| $N_a$                 | number of sub-optimal sets played that includes $a$                          |
| $p_a$                 | probability density of reward for arm $a$                                    |
| $p_{\pi\nu}$          | probability density for the interaction between $\pi$ and $\nu$              |
| $S_{u,t}$             | cumulative reward for user $u$ after $t$ time step                           |
| $X_t$                 | set of rewards obtained during time step $t$                                 |
| $X_{a,t}$             | $t$ -th reward obtained from playing arm $a$                                 |
| $X_{u,t}$             | reward obtained by user $u$ during time step $t$                             |
| $R_T$                 | regret after $T$ time steps                                                  |
| $R_{\pi\nu}$          | regret of running $\pi$ on instance $\nu$ for $T$ time steps                 |
| $T$                   | time horizon                                                                 |
| $T_{a,t}$             | number of time steps arm $a$ is played up till time step $t$                 |
| $U$                   | number of users                                                              |
| $\mathcal{E}_b$       | event that $\mu_a$ is close to $\hat{\mu}_a$ for all $a \in [K]$             |
| $\mathcal{F}_b$       | event that $A_b$ is sub-optimal but “not too bad”                            |
| $\mathcal{G}_{b,i}$   | sub-event of $\mathcal{F}_b$ used in the regret analysis                     |
| $\mathcal{G}_{b,i,a}$ | arm-dependent variant of $\mathcal{G}_{b,i}$                                 |
| $\mathcal{H}$         | sets in $\Gamma$ are played for at most $B/2$ times                          |
| $\mathcal{V}$         | set of all 1-subgaussian <b>EgalMAB</b> instances                            |
| $\mathbb{P}_a$        | probability law of reward for arm $a$                                        |
| $\mathbb{P}_{\pi\nu}$ | probability law for the interaction between $\pi$ and $\nu$                  |
| $\Delta_A$            | difference between $\mu_*$ and $\mu_A$                                       |
| $\Delta_{\max}$       | difference between $\mu_U$ and $\mu_{U+1}$                                   |
| $\Delta_{\min}$       | difference between $\mu_1 + \dots + \mu_U$ and $\mu_{K-U+1} + \dots + \mu_K$ |
| $\Lambda$             | set of arms $[K] \setminus A_*$                                              |
| $\alpha$              | technical constant used for the proof                                        |
| $\beta$               | technical constant used for the proof                                        |
| $\epsilon_{b,b'}$     | confidence radius of playing $b'$ blocks after block $b$                     |
| $\gamma$              | technical constant used for the proof                                        |
| $\lambda$             | Lebesgue measure                                                             |
| $\mu_a$               | expectation for distribution $\mathbb{P}_a$                                  |
| $\mu_A$               | sum of the expected reward over the arms in $A$                              |
| $\mu_*$               | sum of the expected reward over the top $U$ arms                             |
| $\hat{\mu}_{a,b}$     | empirical estimate of $\mu_a$ after playing $a$ for $b$ blocks               |
| $\nu$                 | <b>EgalMAB</b> instance                                                      |
| $\pi$                 | policy for <b>EgalMAB</b>                                                    |
| $\rho$                | counting measure                                                             |

## B Detailed Algorithm

---

**Algorithm 2:** EgalUCB with implementation details

---

```

1 initialize current block  $b = 0$ 
2 initialize current time step  $t = 0$ 
3 foreach  $a \in [K]$  do
4   | let number of blocks  $B_{a,b} = 0$ 
5   | let cumulative reward  $S_{a,t} = 0$ 
6   | let upper confidence bound  $UCB_{a,b} = \infty$ 
7 end
8 while  $b \leq T/U$  do
9   | update  $b = b + 1$ 
10  | let  $A_b \subseteq_U [K]$  be a set of  $U$  arms with highest  $UCB_{a,b-1}$ 
11  | let  $\text{ind} = (1, \dots, U)$ 
12  | foreach  $i \in [U]$  do
13    | update  $t = t + 1$ 
14    | foreach  $u \in [U]$  do
15      | let  $A_{u,t} = A_b[\text{ind}[u]]$ 
16    | end
17    | play  $(A_{1,t}, \dots, A_{U,t})$  and receive  $(X_{1,t}, \dots, X_{U,t})$ 
18    | foreach  $u \in [U]$  do
19      | let  $a = A_b[\text{ind}[u]]$ 
20      | let  $S_{a,t} = S_{a,t-1} + X_{u,t}$ 
21    | end
22    | circular shift  $\text{ind}$  by one to the right
23  | end
24  | foreach  $a \in A_b$  do
25    | let  $B_{a,b} = B_{a,b-1} + 1$ 
26  | end
27  | foreach  $a \in [K]$  do
28    | let  $UCB_{a,b} = \frac{S_{a,t}}{B_{a,b}U} + \sqrt{\frac{6 \ln(bU)}{B_{a,b}U}}$ 
29  | end
30 end

```

---

## C Proofs of Upper Bounds

This section contains the proof for the upper bounds.

**Lemma 1.** *Let  $(\nu, T, U)$  be a 1-subgaussian **EgalMAB**. Then, for all blocks  $b \in [B]$ ,*

$$\mathbb{P}(\mathcal{E}_b^c) \leq \frac{2K}{b^2 U^3}.$$

*Proof.* Since the rewards are 1-subgaussian, we have

$$\mathbb{P}(|\hat{\mu}_{a,b'} - \mu_a| > \epsilon_{b,b'}) \leq 2 \exp\left(-\frac{1}{2} b' U \epsilon_{b,b'}^2\right)$$

for any  $b' \in [b]$  due to Chernoff's bound. Then, by applying the union bound over all arms and all possible values of  $B_{a,b-1}$ , we have

$$\begin{aligned} \mathbb{P}(\mathcal{E}_b^c) &\leq \sum_{a=1}^K \sum_{b'=1}^b \mathbb{P}(|\hat{\mu}_{a,b'} - \mu_a| > \epsilon_{b,b'}) \\ &\leq \sum_{a=1}^K \sum_{b'=1}^b 2 \exp\left(-\frac{1}{2} b' U \epsilon_{b,b'}^2\right) \\ &\leq \sum_{a=1}^K \sum_{b'=1}^b \frac{2}{(bU)^3} \\ &\leq \frac{2K}{b^2 U^3}. \end{aligned} \quad \square$$

**Lemma 2.** *Let  $b \in [B]$ . If the set of arms  $A_b$  played during block  $b$  is sub-optimal and  $\mathcal{E}_b$  occurs, then  $\mathcal{F}_b$  also occurs.*

*Proof.* Since  $A_b$  is assumed to be sub-optimal, we already have  $\Delta_{A_b} > 0$ . Denote  $A_*^-$  to be the set  $A_* \setminus A_b$ . Observe that

$$\Delta_{A_b} = \sum_{a \in A_*} \mu_a - \sum_{a \in A_b} \mu_a = \sum_{a \in A_*^-} \mu_a - \sum_{a \in A_b^-} \mu_a.$$

since the terms that are associated to arms in  $A_b \cap A_*$  cancel out. Furthermore, since **EgalUCB** chooses  $A_b$  instead of  $A_*$ , we have

$$\sum_{a \in A_b^-} \hat{\mu}_{a, B_{a,b-1}} + \epsilon_{b-1, B_{a,b-1}} \geq \sum_{a \in A_*^-} \hat{\mu}_{a, B_{a,b-1}} + \epsilon_{b-1, B_{a,b-1}}.$$

Using these observations, we have

$$\begin{aligned} \sum_{a \in A_b^-} \mu_a + 2\epsilon_{b-1, B_{a,b-1}} &\geq \sum_{a \in A_b^-} \hat{\mu}_{a, B_{a,b-1}} + \epsilon_{b-1, B_{a,b-1}} \\ &\geq \sum_{a \in A_*^-} \hat{\mu}_{a, B_{a,b-1}} + \epsilon_{b-1, B_{a,b-1}} \\ &\geq \sum_{a \in A_*^-} \mu_a \end{aligned}$$

where the first and last inequality holds due to the assumption that  $\mathcal{E}_b$  occurs. Rearranging this, we have

$$\begin{aligned}\Delta_{A_b} &= \sum_{a \in A_*^-} \mu_a - \sum_{a \in A_b^-} \mu_a \leq 2 \sum_{a \in A_b^-} \epsilon_{b-1, B_{a, b-1}} \\ &\leq 2 \sum_{a \in A_b^-} \epsilon_{B, B_{a, b-1}}\end{aligned}$$

where the last inequality holds because  $b-1 \leq B$ .  $\square$

**Lemma 3.** *Let  $(\nu, T, U)$  be a 1-subgaussian EgalMAB. Then, after  $T$  time steps, for all users  $u \in [U]$ , we have*

$$R_{u, T} \leq \sum_{b=1}^B \mathbb{E}[\Delta_{A_b} \mathbb{I}\{\mathcal{F}_b\}] + \frac{\pi^2 K \Delta_{\max}}{3U^3}.$$

*Proof.* We begin by decomposing  $R_{u, T}$  into

$$R_{u, T} = \frac{T\mu_*}{U} - \mathbb{E}[S_{u, T}] = \sum_{b=1}^B \mu_* - \mathbb{E}[\mu_{A_b}] = \sum_{b=1}^B \mathbb{E}[\Delta_{A_b}].$$

Since  $\mathbb{I}\{\mathcal{E}\} + \mathbb{I}\{\mathcal{E}^c\} = 1$  almost surely for any event  $\mathcal{E}$ , we can split

$$\sum_{b=1}^B \mathbb{E}[\Delta_{A_b}] = \underbrace{\sum_{b=1}^B \mathbb{E}[\Delta_{A_b} \mathbb{I}\{\mathcal{E}_b\}]}_{(\spadesuit)} + \underbrace{\sum_{b=1}^B \mathbb{E}[\Delta_{A_b} \mathbb{I}\{\mathcal{E}_b^c\}]}_{(\clubsuit)}.$$

To bound  $(\spadesuit)$ , we use  $\mathbb{I}\{\Delta_{A_b} = 0\} + \mathbb{I}\{\Delta_{A_b} > 0\} = 1$  to get

$$\sum_{b=1}^B \mathbb{E}[\Delta_{A_b} \mathbb{I}\{\mathcal{E}_b\} \mathbb{I}\{\Delta_{A_b} = 0\}] + \sum_{b=1}^B \mathbb{E}[\Delta_{A_b} \mathbb{I}\{\mathcal{E}_b\} \mathbb{I}\{\Delta_{A_b} > 0\}].$$

Since  $\Delta_{A_b} \mathbb{I}\{\Delta_{A_b} = 0\} = 0$  almost surely, the first term is 0. To deal with the second term, observe for any events  $\mathcal{E}, \mathcal{E}', \mathcal{F}$ , if  $\mathcal{E}$  and  $\mathcal{E}'$  implies  $\mathcal{F}$ , then  $\mathbb{I}\{\mathcal{E}_1 \cap \mathcal{E}_2\} = \mathbb{I}\{\mathcal{E}_1\} \mathbb{I}\{\mathcal{E}_2\} \leq \mathbb{I}\{\mathcal{F}\}$  almost surely. As such, we have

$$\sum_{b=1}^B \mathbb{E}[\Delta_{A_b} \mathbb{I}\{\mathcal{E}_b\} \mathbb{I}\{\Delta_{A_b} > 0\}] \leq \sum_{b=1}^B \mathbb{E}[\Delta_{A_b} \mathbb{I}\{\mathcal{F}_b\}]$$

by Lemma 2, thus concluding the proof for  $(\spadesuit)$ . To bound  $(\clubsuit)$ , observe that

$$\sum_{b=1}^B \mathbb{E}[\Delta_{A_b} \mathbb{I}\{\mathcal{E}_b^c\}] = \sum_{b=1}^B \mathbb{E}[\Delta_{A_b} | \mathcal{E}_b^c] \mathbb{P}(\mathcal{E}_b^c).$$

The expectation term can be bounded by

$$\begin{aligned}\mathbb{E}[\Delta_{A_b} | \mathcal{E}_b^c] &= \sum_{A \subseteq [K]} \mathbb{P}(A_b = A | \mathcal{E}_b^c) \Delta_A \\ &\leq \sum_{A \subseteq [K]} \mathbb{P}(A_b = A | \mathcal{E}_b^c) \Delta_{\max} \\ &= \Delta_{\max}.\end{aligned}$$

Furthermore, we know that  $\mathbb{P}(\mathcal{E}_b^c) \leq 2K/b^2U^3$  from Lemma 1. Substituting these results back, we have

$$\begin{aligned} \sum_{b=1}^B \mathbb{E}[\Delta_{A_b} | \mathcal{E}_b^c] \mathbb{P}(\mathcal{E}_b^c) &\leq \sum_{b=1}^B \Delta_{\max} \cdot \frac{2K}{b^2U^3} \\ &\leq \frac{2K\Delta_{\max}}{U^3} \sum_{b=1}^{\infty} \frac{1}{b^2} \\ &= \frac{\pi^2 K \Delta_{\max}}{3U^3}, \end{aligned}$$

thus concluding the proof for ( $\clubsuit$ ).  $\square$

**Lemma 4.** Assume that  $b > K/U$ . On the event  $\mathcal{F}_b$ , exactly one of the events in  $\{\mathcal{G}_{b,i}\}_i$  occurs.

*Proof.* It is clear by definition that at most one of  $\{\mathcal{G}_{b,i}\}_i$  can happen. We are left to show that at least one of  $\{\mathcal{G}_{b,i}\}_i$  must happen. Suppose that none of  $\{\mathcal{G}_{b,i}\}_i$  happens. Thus  $|L_{b,i}| < \beta^i U$  for all  $i \in \mathbb{N}$ . First, we claim that all arms  $a \in A_b^-$  are played at least once after block  $K/U$ . To see this, observe that the radius  $\epsilon_{a,b} = \infty$  until  $a$  is played; and after which  $\epsilon_{a,b} < \infty$ . This claim implies that there exist some sufficiently large  $j \in \mathbb{N}$  such that the set  $L_{b,j} = \emptyset$ . Moreover, since  $\{L_{b,i}\}_i$  is a non-increasing sequence of sets, we have that for all  $b > K/U$ , all arms  $a \in A_b^-$  must lie in exactly one  $L_{b,i-1} \setminus L_{b,i}$ . Thus, we have

$$\begin{aligned} \sum_{a \in A_b^-} \frac{1}{\sqrt{B_{a,b-1}}} &= \sum_{i=1}^{\infty} \sum_{a \in L_{b,i-1} \setminus L_{b,i}} \frac{1}{\sqrt{B_{a,b-1}}} \\ &< \sum_{i=1}^{\infty} \sum_{a \in L_{b,i-1} \setminus L_{b,i}} \frac{1}{\sqrt{m_{b,i}}} \\ &= \sum_{i=1}^{\infty} \frac{|L_{b,i-1}| - |L_{b,i}|}{\sqrt{m_{b,i}}} \\ &= \frac{|L_{b,0}|}{\sqrt{m_{b,1}}} + \sum_{i=1}^{\infty} |L_{b,i}| \cdot \left( \frac{1}{\sqrt{m_{b,i+1}}} - \frac{1}{\sqrt{m_{b,i}}} \right) \\ &< \frac{\beta^0 U}{\sqrt{m_{b,1}}} + \sum_{i=1}^{\infty} \beta^i U \cdot \left( \frac{1}{\sqrt{m_{b,i+1}}} - \frac{1}{\sqrt{m_{b,i}}} \right) \\ &= U \sum_{i=1}^{\infty} \frac{\beta^{i-1} - \beta^i}{\sqrt{m_{b,i}}}. \end{aligned}$$

Substituting  $m_{b,i}$  into the inequality, we have

$$U \sum_{i=1}^{\infty} \frac{\beta^{i-1} - \beta^i}{\sqrt{m_{b,i}}} = U \sum_{i=1}^{\infty} \frac{\beta^{i-1} - \beta^i}{\sqrt{\gamma \alpha^i U \ln(BU) / \Delta_{A_b}^2}}$$

Rearranging the terms and evaluating the constants, we have

$$\begin{aligned} U \sum_{i=1}^{\infty} \frac{\beta^{i-1} - \beta^i}{\sqrt{\gamma \alpha^i U \ln(BU) / \Delta_{A_b}^2}} &= \frac{1 - \beta}{\beta} \sqrt{\frac{U}{\gamma \ln(BU)}} \sum_{i=1}^{\infty} \left( \frac{\beta}{\sqrt{\alpha}} \right)^i \cdot \Delta_{A_b} \\ &< \sqrt{\frac{U}{24 \ln(BU)}} \cdot \Delta_{A_b}. \end{aligned}$$

Since  $\mathcal{F}_b$  happens, we have

$$\Delta_{A_b} \leq \sum_{a \in A_b^-} \sqrt{\frac{24 \ln(BU)}{B_{a,b-1} U}} < \Delta_{A_b}$$

which is a contradiction. Hence, at least one of the events  $\{\mathcal{G}_{b,i}\}_i$  must happen.  $\square$

**Lemma 5.** Let  $\nu = (p_1, \dots, p_K)$ . Suppose that  $p_a$  is the density for a 1-subgaussian distribution for all  $a \in [K]$ . Then, after  $T$  time steps,

$$\begin{aligned} \sum_{b=1}^B \mathbb{E}[\Delta_{A_b} \mathbb{I}\{\mathcal{F}_b\}] &= \sum_{i=1}^{\infty} \sum_{b=b_0}^B \Delta_{A_b} \mathbb{I}\{\mathcal{G}_{b,i}\} + \sum_{b=1}^{b_0-1} \Delta_{A_b} \mathbb{I}\{\mathcal{F}_b\} \\ &\leq 2136 \ln(BU) \sum_{a \in \Lambda} \frac{1}{\Delta_{a,N_a}} + \frac{K \Delta_{\max}}{U} \\ &\leq \frac{2136(K-U) \ln(BU)}{\Delta_{\min}} + \frac{K \Delta_{\max}}{U}. \end{aligned}$$

for all users  $u \in [U]$ .

*Proof.* For each arm  $a \in [K]$ , each index  $i \in \mathbb{N}$ , and each block  $b \in [B]$ , let

$$\mathcal{G}_{b,i,a} = \mathcal{G}_{b,i} \cap \{a \in A_b^-\} \cap \{B_{a,b-1} \leq m_{b,i}\}$$

be an arm-dependent variant of the event  $\mathcal{G}_{b,i}$ . Since at least  $\beta^i U$  arms satisfy  $\mathcal{G}_{b,i,a}$  when  $\mathcal{G}_{b,i}$  occurs, we have

$$\mathbb{I}\{\mathcal{G}_{b,i}\} \leq \frac{1}{\beta^i U} \sum_{a \in \Lambda} \mathbb{I}\{\mathcal{G}_{b,i,a}\}$$

where  $\Lambda := [K] \setminus A_*$  is the set of arms that are not in  $A_*$ . For each arm  $a \in \Lambda$ , let

$$N_a := |\{A_b : b \in [B] \text{ and } a \in A_b^- \text{ and } \Delta_{A_b} > 0\}|$$

be the number of distinct sub-optimal sets played that includes  $a$ , and let  $A_{a,1}, \dots, A_{a,N_a}$  be these sets sorted by non-ascending order of its sub-optimality gap. In other words, if we denote

$$\Delta_{a,j} := \Delta_{A_{a,j}},$$

then  $\Delta_{a,1} \geq \dots \geq \Delta_{a,N_a}$ . Let  $b_0 = K/U + 1$ . Almost surely we have

$$\begin{aligned} \sum_{b=b_0}^B \Delta_{A_b} \mathbb{I}\{\mathcal{G}_{b,i}\} &\leq \sum_{a \in \Lambda} \sum_{b=b_0}^B \frac{\Delta_{A_b}}{\beta^i U} \mathbb{I}\{\mathcal{G}_{b,i,a}\} \\ &= \sum_{a \in \Lambda} \sum_{b=b_0}^B \sum_{j=1}^{N_a} \frac{\Delta_{a,j}}{\beta^i U} \mathbb{I}\{\mathcal{G}_{b,i,a}\} \mathbb{I}\{A_b = A_{a,j}\} \\ &= \sum_{a \in \Lambda} \sum_{j=1}^{N_a} \frac{\Delta_{a,j}}{\beta^i U} \sum_{b=b_0}^B \mathbb{I}\{\mathcal{G}_{b,i,a}\} \mathbb{I}\{A_b = A_{a,j}\} \end{aligned}$$

We can upper bound this expression by considering the worst-case realization of the number of blocks each set  $A_{a,j}$  is played. Let us start with  $j = 1$ . Since  $A_{a,1}$  has the largest gap  $\Delta_{a,1}$ , the worst case realization is when  $A_{a,1}$  is played as many times as the event  $\mathcal{G}_{b,i,a}$  allows. Recall that  $\mathcal{G}_{b,i,a}$  implies that  $B_{a,b-1} \leq m_{b,i}$ . It follows that we can play  $A_{a,1}$  for at most  $\gamma \alpha^i U \ln(BU) / \Delta_{a,1}^2$  blocks. We can use this argument to find the worst-case realization on the number of blocks  $A_{a,2}$  is played. This works out to be

$$\frac{\gamma \alpha^i U \ln(BU)}{\Delta_{a,2}^2} - \frac{\gamma \alpha^i U \ln(BU)}{\Delta_{a,1}^2} = \gamma \alpha^i U \ln(BU) \cdot \left( \frac{1}{\Delta_{a,2}^2} - \frac{1}{\Delta_{a,1}^2} \right).$$

Repeating this argument, we have

$$\begin{aligned} &\sum_{a \in \Lambda} \sum_{j=1}^{N_a} \frac{\Delta_{a,j}}{\beta^i U} \sum_{b=b_0}^B \mathbb{I}\{\mathcal{G}_{b,i,a}\} \mathbb{I}\{A_b = A_{a,j}\} \\ &\leq \sum_{a \in \Lambda} \frac{\gamma \alpha^i \ln(BU)}{\beta^i} \cdot \left( \frac{1}{\Delta_{a,1}} + \sum_{j=2}^{N_a} \Delta_{a,j} \left( \frac{1}{\Delta_{a,j}^2} - \frac{1}{\Delta_{a,j-1}^2} \right) \right). \end{aligned}$$

The terms within the bracket can be further bounded by

$$\begin{aligned}
& \frac{1}{\Delta_{a,1}} + \sum_{j=2}^{N_a} \Delta_{a,j} \left( \frac{1}{\Delta_{a,j}^2} - \frac{1}{\Delta_{a,j-1}^2} \right) \\
&= \frac{1}{\Delta_{a,N_a}} + \sum_{j=1}^{N_a-1} \frac{\Delta_{a,j} - \Delta_{a,j+1}}{\Delta_{a,j}^2} \\
&\leq \frac{1}{\Delta_{a,N_a}} + \sum_{j=1}^{N_a-1} \frac{\Delta_{a,j} - \Delta_{a,j+1}}{\Delta_{a,j} \cdot \Delta_{a,j+1}} \\
&= \frac{1}{\Delta_{a,N_a}} + \sum_{j=1}^{N_a-1} \left( \frac{1}{\Delta_{a,j+1}} - \frac{1}{\Delta_{a,j}} \right) \\
&< \frac{2}{\Delta_{a,N_a}}.
\end{aligned}$$

By combining these results, we have, almost surely, that

$$\begin{aligned}
\sum_{b=1}^B \Delta_{A_b} \mathbb{I}\{\mathcal{F}_b\} &= \sum_{b=1}^{b_0-1} \Delta_{A_b} \mathbb{I}\{\mathcal{F}_b\} + \sum_{b=b_0}^B \Delta_{A_b} \mathbb{I}\{\mathcal{F}_b\} \\
&\leq \frac{K\Delta_{\max}}{U} + \sum_{i=1}^{\infty} \sum_{b=b_0}^B \Delta_{A_b} \mathbb{I}\{\mathcal{G}_{b,i}\} \\
&\leq \frac{K\Delta_{\max}}{U} + \sum_{i=1}^{\infty} \sum_{a \in \Lambda} \frac{2\gamma\alpha^i \ln(BU)}{\beta^i \Delta_{a,N_a}} \\
&\leq \frac{K\Delta_{\max}}{U} + 2\gamma \ln(BU) \sum_{a \in \Lambda} \frac{1}{\Delta_{a,N_a}} \sum_{i=1}^{\infty} \left( \frac{\alpha}{\beta} \right)^i \\
&< \frac{K\Delta_{\max}}{U} + 2136 \ln(BU) \sum_{a \in \Lambda} \frac{1}{\Delta_{a,N_a}} \\
&\leq \frac{K\Delta_{\max}}{U} + \frac{2136(K-U) \ln(BU)}{\Delta_{\min}}
\end{aligned}$$

where the last inequality holds because for all arms  $a \in \Lambda$ , we have  $\Delta_{a,N_a} \geq \mu_U - \mu_a \geq \Delta_{\min}$ . As such,

$$\sum_{a \in \Lambda} \frac{1}{\Delta_{a,N_a}} \leq \frac{K-U}{\Delta_{\min}}. \quad \square$$

**Note.** Observe that when  $U = 1$ , we have  $\Delta_{a,N_a} = \Delta_a$ . As such, we can replace the last inequality using

$$\ln(BU) \sum_{a \in \Lambda} \frac{1}{\Delta_{a,N_a}} = \sum_{a: \Delta_a > 0} \frac{\ln(T)}{\Delta_a}$$

to obtain the bound for the classic **UCB1** algorithm.

**Theorem 1** (Problem-Dependent Upper Bound). *Let  $(\nu, T, U)$  a 1-subgaussian **EgalMAB**. After running **EgalUCB** for  $T$  time steps, we have*

$$R_T \leq \frac{2136(K-U) \ln(T)}{\Delta_{\min}} + \frac{4K\Delta_{\max}}{U}.$$

*Proof.* We can bound the regret by

$$\begin{aligned}
R_{u,T} &\leq \sum_{b=1}^B \mathbb{E}[\Delta_{A_b} \mathbb{I}\{\mathcal{F}_b\}] + \frac{\pi^2 K \Delta_{\max}}{3U^3} \\
&\leq \frac{2136(K-U) \ln(BU)}{\Delta_{\min}} + \frac{K \Delta_{\max}}{U} + \frac{\pi^2 K \Delta_{\max}}{3U^3} \\
&\leq \frac{2136(K-U) \ln(T)}{\Delta_{\min}} + \frac{4K \Delta_{\max}}{U}
\end{aligned}$$

where the first inequality holds due to Lemma 3 and the second inequality holds due to Lemma 5.  $\square$

**Theorem 2** (Problem-Independent Upper Bound). *Let  $(\nu, T, U)$  be a 1-subgaussian **EgalMAB** with  $\mu_a \in [0, 1]$  for all arms  $a \in [K]$ . After running **EgalUCB** for  $T$  time steps, we have*

$$R_T \leq \sqrt{\frac{8544(K-U) T \ln(T)}{U}} + \frac{4K \min\{U, K-U\}}{U}.$$

*Proof.* Set

$$\delta = \sqrt{\frac{2136(K-U) \ln(BU)}{B}}.$$

Since  $\mathbb{I}\{\Delta_{A_b} < \delta\} + \mathbb{I}\{\Delta_{A_b} \geq \delta\} = 1$ , we have

$$\begin{aligned}
\sum_{b=b_0}^B \mathbb{E}[\Delta_{A_b} \mathbb{I}\{\mathcal{F}_b\}] &= \sum_{b=b_0}^B \mathbb{E}[\Delta_{A_b} \mathbb{I}\{\mathcal{F}_b\} \mathbb{I}\{\Delta_{A_b} < \delta\}] \\
&\quad + \sum_{b=b_0}^B \mathbb{E}[\Delta_{A_b} \mathbb{I}\{\mathcal{F}_b\} \mathbb{I}\{\Delta_{A_b} \geq \delta\}].
\end{aligned}$$

We can trivially bound  $\mathbb{E}[\Delta_{A_b} \mathbb{I}\{\mathcal{F}_b\} \mathbb{I}\{\Delta_{A_b} < \delta\}]$  by  $\delta$ . The second term can be bounded similarly as in Theorem 5 by using  $\Delta_{A_b} \geq \delta$  instead of  $\Delta_{A_b} \geq \Delta_{\min}$ . Then, we have

$$\begin{aligned}
\sum_{b=b_0}^B \mathbb{E}[\Delta_{A_b} \mathbb{I}\{\mathcal{F}_b\}] &\leq B\delta + \frac{2136(K-U) \ln(BU)}{\delta} \\
&= \sqrt{8544(K-U) \cdot B \ln(BU)}.
\end{aligned}$$

Furthermore, since  $\mu_a \in [0, 1]$  for all  $a \in [K]$ , we have

$$\Delta_{\max} \leq \min\{U, K-U\}.$$

To understand this bound, note that  $\Delta_{\max} \leq U$  generally, but when  $K < 2U$ , this can be tightened because there are overlaps between the top  $U$  arms and the bottom  $U$  arms. This works out to  $\Delta_{\max} \leq K - U$ . By considering the remaining terms in the regret, we have

$$\begin{aligned}
R_T &\leq \sqrt{8544(K-U) \cdot B \ln(BU)} + \frac{4K \Delta_{\max}}{U} \\
&\leq \sqrt{\frac{8544(K-U) \cdot T \ln(T)}{U}} + \frac{4K \min\{U, K-U\}}{U}.
\end{aligned}$$

$\square$

## D Proofs of Lower Bound

**Lemma 6.** *Let  $\nu$  and  $\nu'$  be the *EgalMAB* instances defined by equation 1 and equation 2. Under the assumptions of Theorem 3, we have*

$$\begin{aligned} R_{\pi\nu} + R_{\pi\nu'} &> \frac{\Delta T}{4} (\mathbb{P}_{\pi\nu}(\mathcal{H}) + \mathbb{P}_{\pi\nu'}(\mathcal{H}^c)) \\ &\geq \frac{\Delta T}{8} \exp(-D_{\text{KL}}(\mathbb{P}_{\pi\nu} \parallel \mathbb{P}_{\pi\nu'})). \end{aligned}$$

*Proof.* Note that whenever we play some  $A \notin \Gamma$  under  $\nu$ , there will be at least  $U/2$  users who will incur an instantaneous regret of at least  $\Delta$ . Under  $\mathcal{H}$ , the total number of sub-optimal arms played across all users and all time steps is at least  $TU/4$ . By the pigeonhole principle, we know that at least one user played sub-optimal arms for at least  $T/4$  times. As such, the regret is at least  $\Delta T/4$ . A similar argument can be used to show that under  $\nu'$  and  $\mathcal{H}^c$ , the regret is at least  $\Delta T/4$ . Thus

$$\begin{aligned} R_{T,\pi,\nu} + R_{T,\pi,\nu'} &> \frac{\Delta T}{4} (\mathbb{P}_{\pi\nu}(\mathcal{H}) + \mathbb{P}_{\pi\nu'}(\mathcal{H}^c)) \\ &\geq \frac{\Delta T}{8} \exp(-D_{\text{KL}}(\mathbb{P}_{\pi\nu} \parallel \mathbb{P}_{\pi\nu'})) \end{aligned}$$

where the last inequality holds due to the Bretagnolle–Huber inequality.  $\square$

**Lemma 7.** *Let  $\nu$  and  $\nu'$  be the *EgalMAB* instances defined by equation 1 and equation 2. Under the assumptions of Theorem 3, we have*

$$D_{\text{KL}}(\mathbb{P}_{\pi\nu} \parallel \mathbb{P}_{\pi\nu'}) \leq 4\Delta^2 \sum_{a' \in A'} \mathbb{E}_{\pi\nu}[T_{a',T}].$$

*Proof.* Using the definition of the KL-divergence and applying the chain rule, we have

$$\begin{aligned} D_{\text{KL}}(\mathbb{P}_{\pi\nu} \parallel \mathbb{P}_{\pi\nu'}) &= \mathbb{E}_{\pi\nu} \left[ \ln \left( \frac{d\mathbb{P}_{\pi\nu}}{d\mathbb{P}_{\pi\nu'}} \right) \right] \\ &= \mathbb{E}_{\pi\nu} \left[ \ln \left( \frac{d\mathbb{P}_{\pi\nu}/d(\rho^U \times \lambda^U)^T}{d\mathbb{P}_{\pi\nu'}/d(\rho^U \times \lambda^U)^T} \right) \right]. \end{aligned}$$

We then substitute the Radon-Nikodym derivatives and simplify the terms to get

$$\begin{aligned}
& \mathbb{E}_{\pi\nu} \left[ \ln \left( \frac{d\mathbb{P}_{\pi\nu}/d(\rho^U \times \lambda^U)^T}{d\mathbb{P}_{\pi\nu'}/d(\rho^U \times \lambda^U)^T} \right) \right] \\
&= \mathbb{E}_{\pi\nu} \left[ \ln \prod_{t=1}^T \frac{\pi(A_t|A_1, X_1, \dots, A_{t-1}, X_{t-1})}{\pi(A_t|A_1, X_1, \dots, A_{t-1}, X_{t-1})} \prod_{u=1}^U \frac{p_{A_{u,t}}(X_{u,t})}{p'_{A_{u,t}}(X_{u,t})} \right] \\
&= \mathbb{E}_{\pi\nu} \left[ \sum_{t=1}^T \sum_{u=1}^U \ln \frac{p_{A_{u,t}}(X_{u,t})}{p'_{A_{u,t}}(X_{u,t})} \right] \\
&= \sum_{t=1}^T \sum_{u=1}^U \mathbb{E}_{\pi\nu} \left[ \mathbb{E}_{\pi\nu} \left[ \ln \frac{p_{A_{u,t}}(X_{u,t})}{p'_{A_{u,t}}(X_{u,t})} \mid A_{u,t} \right] \right] \\
&= \sum_{t=1}^T \sum_{u=1}^U \mathbb{E}_{\pi\nu} [D_{\text{KL}}(\mathbb{P}_{A_{u,t}} \parallel \mathbb{P}'_{A_{u,t}})] \\
&= \sum_{t=1}^T \mathbb{E}_{\pi\nu} \left[ \sum_{a \in A_t} D_{\text{KL}}(\mathbb{P}_a \parallel \mathbb{P}'_a) \right] \\
&= \sum_{t=1}^T \mathbb{E}_{\pi\nu} \left[ \sum_{A \subseteq U[K]} \sum_{a \in A} D_{\text{KL}}(\mathbb{P}_a \parallel \mathbb{P}'_a) \cdot \mathbb{I}[A_t = A] \right] \\
&= \sum_{A \subseteq U[K]} \sum_{a \in A} D_{\text{KL}}(\mathbb{P}_a \parallel \mathbb{P}'_a) \sum_{t=1}^T \mathbb{E}_{\pi\nu} [\mathbb{I}[A_t = A]] \\
&= \sum_{A \subseteq U[K]} \sum_{a \in A} D_{\text{KL}}(\mathbb{P}_a \parallel \mathbb{P}'_a) \cdot \mathbb{E}_{\pi\nu}[T_{A,T}]
\end{aligned}$$

Note that the KL-divergence between two Gaussian measures with mean  $\mu_1$  and  $\mu_2$  and variance 1 is  $(\mu_1 - \mu_2)^2$ . Thus, we have

$$\begin{aligned}
& \sum_{A \subseteq U[K]} \sum_{a \in A} D_{\text{KL}}(\mathbb{P}_a \parallel \mathbb{P}'_a) \cdot \mathbb{E}_{\pi\nu}[T_{A,T}] \\
&= \sum_{A \subseteq U[K]} \mathbb{E}_{\pi\nu}[T_{A,T}] \sum_{a \in A} D_{\text{KL}}(\mathbb{P}_a \parallel \mathbb{P}'_a) \\
&= \sum_{A \subseteq U[K]} \mathbb{E}_{\pi\nu}[T_{A,T}] \cdot 4\Delta^2 |\{a' \in A' \mid a' \in A\}| \\
&= 4\Delta^2 \sum_{a' \in A'} \sum_{A: a' \in A} \mathbb{E}_{\pi\nu}[T_{A,T}] \\
&= 4\Delta^2 \sum_{a' \in A'} \mathbb{E}_{\pi\nu}[T_{a',T}].
\end{aligned}$$

□

**Lemma 8.** *Let  $\nu$  and  $\nu'$  be the **EgalMAB** instances defined in equation 1 and equation 2. Under the assumptions of Theorem 3, we have*

$$\sum_{a \in A'} T_{a,T} \leq \frac{TU^2}{K - U}$$

*almost surely.*

*Proof.* Suppose, for sake of contradiction, that

$$\sum_{a \in A'} T_{a,T} > \frac{TU^2}{K-U}.$$

Note that since  $A'$  is the set of least played arms, we have

$$\begin{aligned} \sum_{A \subseteq_U [K] \setminus [U]} \sum_{a \in A} T_{a,T} &> \sum_{A \subseteq_U [K] \setminus [U]} \frac{TU^2}{K-U} \\ &= \binom{K-U}{U} \frac{TU^2}{K-U}. \end{aligned}$$

Furthermore, the same quantity can be upper bounded by

$$\begin{aligned} \sum_{A \subseteq_U [K] \setminus [U]} \sum_{a \in A} T_{a,T} &= \sum_{a \in [K] \setminus [U]} \sum_{A: a \in A} T_{a,T} \\ &= \sum_{a \in [K] \setminus [U]} \binom{K-U}{U} \frac{U}{K-U} T_{a,T} \\ &= \binom{K-U}{U} \frac{U}{K-U} \sum_{a \in [K] \setminus [U]} T_{a,T} \\ &\leq \binom{K-U}{U} \frac{U}{K-U} \sum_{a \in [K]} T_{a,T} \\ &= \binom{K-U}{U} \frac{TU^2}{K-U}, \end{aligned}$$

which is a contradiction.  $\square$

**Theorem 3** (Policy-Independent Lower Bound). *Suppose  $K \geq 2U$ . For any policy  $\pi$ , there exist an **EgalMAB** instance  $\nu \in \mathcal{V}$  with regret*

$$R_{\pi\nu} \geq \frac{\sqrt{(K-U)T}}{76U}.$$

*Proof.* We have

$$\begin{aligned} R_{T,\pi,\nu} + R_{T,\pi,\nu'} &\geq \frac{\Delta T}{8} \exp\left(-4\Delta^2 \sum_{a' \in A'} \mathbb{E}_{\pi\nu}[T_{a',T}]\right) \\ &\geq \frac{\Delta T}{8} \exp\left(-\frac{4\Delta^2 TU^2}{K-U}\right) \\ &= \frac{\Delta T}{8} \exp(-1/2) \\ &> \frac{\sqrt{T(K-U)}}{38U}. \end{aligned}$$

Since  $2 \max\{R_{T,\pi,\nu}, R_{T,\pi,\nu'}\} \geq R_{T,\pi,\nu} + R_{T,\pi,\nu'}$ , dividing by 2 concludes the proof.  $\square$
